# Supplementary material for: Suppression of miR-708 inhibits the Wnt/β-catenin signaling pathway by activating DKK3 in adult B-all
Source: PubMed Central journal article supplement (PMC5609988; doi:10.18632/oncotarget.19342), 2017-07-18
Supplement: oncotarget-08-64114-s001.pdf [file oncotarget-08-64114-s001.pdf]

## **Suppression of miR-708 inhibits the Wnt/ $\beta$ -catenin signaling pathway by activating DKK3 in adult B-all**

### **SUPPLEMENTARY MATERIALS**

**Supplementary Table 1: Patient characteristics**

**See Supplementary File 1**
